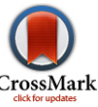

# Overexpression of MMP-9 and Its Inhibitors in Blood Mononuclear Cells after Myocardial Infarction - Is It Associated with Depressive Symptomatology?

Simon Jönsson, Anna K. Lundberg, Lena Jonasson\*

Department of Medical and Health Sciences, Division of Cardiovascular Medicine, Linköping University, Linköping, Sweden

## Abstract

**Background:** Matrix metalloproteinase (MMP)-9 may play a central role in the development and progression of atherosclerosis. Emerging evidence also indicates an association between MMP-9 and depressive symptomatology. Here, we investigated whether expression of MMP-9 and its inhibitors in blood mononuclear cells and plasma were related to depressive symptoms in patients with a recent myocardial infarction (MI).

**Methods and Results:** Blood sampling was performed between 6 and 18 months after MI in 57 patients. Forty-one clinically healthy subjects were included as controls. Gene expression of MMP-9 and its main tissue inhibitors TIMP-1 and -2 were analyzed in freshly isolated or cultured blood mononuclear cells. Corresponding protein levels were assessed in cell supernatants and plasma. In post-MI patients, mRNA levels of MMP-9 and TIMP-1 and -2 were significantly higher than in controls while protein levels in cell supernatants and plasma did not differ between groups. The Center for Epidemiological Studies - Depression (CES-D) scale was used to assess depressive symptomatology. Repeated assessments during the first 18 months after MI showed significantly higher CES-D scores in patients compared with controls. However, there were no relationships between depressive mood and any of the measurements of MMP-9 or TIMPs.

**Conclusion:** Our findings indicate that overexpression of MMP-9 and TIMPs in blood mononuclear cells and elevated depressive symptoms represent two unrelated phenomena after MI.

**Citation:** Jönsson S, Lundberg AK, Jonasson L (2014) Overexpression of MMP-9 and Its Inhibitors in Blood Mononuclear Cells after Myocardial Infarction - Is It Associated with Depressive Symptomatology? PLoS ONE 9(8): e105572. doi:10.1371/journal.pone.0105572

**Editor:** Nikos K. Karamanos, University of Patras, Greece

**Received:** June 25, 2014; **Accepted:** July 25, 2014; **Published:** August 25, 2014

**Copyright:** © 2014 Jönsson et al. This is an open-access article distributed under the terms of the Creative Commons Attribution License, which permits unrestricted use, distribution, and reproduction in any medium, provided the original author and source are credited.

**Data Availability:** The authors confirm that all data underlying the findings are fully available without restriction. All relevant data are within the paper.

**Funding:** This study was supported by Swedish Research Council, grant number 521-2011-3847, ([www.vr.se](http://www.vr.se)) and the Swedish Heart-Lung Foundation, grant number 20120608, ([www.hjart-lungfonden.se](http://www.hjart-lungfonden.se)). The funders had no role in study design, data collection and analysis, decision to publish, or preparation of the manuscript.

**Competing Interests:** The authors have declared that no competing interests exist.

\* Email: [lena.jonasson@liu.se](mailto:lena.jonasson@liu.se)

## Introduction

Matrix metalloproteinases (MMPs) are a family of zinc-dependent enzymes involved in extracellular matrix remodeling and leukocyte recruitment to inflammatory sites, thus acting as important modulators of inflammation. MMPs are strictly regulated by endogenous tissue inhibitors of metalloproteinases (TIMPs), and excessive or imbalanced MMP secretion has been related to tissue damage in several inflammatory disorders. Atherosclerosis shares several characteristics with a chronic inflammatory process and MMP-9 is considered to play a key role in disease progression and vulnerability to plaque rupture [1,2]. Overexpression of MMP-9 is not only detected in atherosclerotic lesions but also in peripheral blood. Patients with acute myocardial infarction (MI) exhibit increased expression of MMP-9 mRNA in blood monocytes. Furthermore, increased expression of MMP-9 has been detected in blood mononuclear cells of patients with stable CAD and patients with advanced carotid disease. A number of studies have also shown that plasma levels of MMP-9 in CAD patients are associated with plaque progression and recurrent cardiac events [3,4].

Lately, MMP-9 has emerged as a candidate marker of depression. A significant association between depressive symptoms and MMP-9 levels in plasma was recently demonstrated in a Swedish middle-aged normal population [5]. Moreover, MMP-9 in plasma was highlighted as one of the strongest markers of major depression when a large protein profiling investigation was performed in order to identify novel biomarkers of psychiatric disorders [6]. Interestingly, Lutgendorf et al. [7] reported that ovarian cancer patients with elevated depressive symptoms had increased levels of MMP-9 in tumor-associated macrophages compared with non-depressed patients.

The prevalence of depression and elevated depressive symptoms is higher in patients with a manifest coronary artery disease (CAD) than in the general population and depressive symptoms in CAD patients are also associated with increased risk of recurrent cardiac events [8]. The underlying mechanisms are still not clarified but it is widely discussed that inflammation is a potential link between depression and CAD. A number of studies in various populations have reported correlations between depression and inflammatory

**Table 1.** Characteristics of controls and post-MI patients.

|                                               | Controls (n = 41) | Post-MI patients (n = 57) | P      |
|-----------------------------------------------|-------------------|---------------------------|--------|
| <i>Clinical measurements</i>                  |                   |                           |        |
| Age, years                                    | 67 (66-72)        | 66 (61-72)                | 0.16   |
| Sex (male/female)                             | 30/11             | 46/11                     | 0.46   |
| Body mass index, kg/m <sup>2</sup>            | 26 (25-28)        | 27 (25-30)                | 0.11   |
| Smoking, n (%)                                | 1 (2.4)           | 6 (12)                    | 0.23   |
| Diabetes, n (%)                               | 0 (0)             | 12 (21)                   | 0.001  |
| Statin treatment, n (%)                       | 4 (9.8)           | 56 (98)                   | <0.001 |
| Anti-hypertensive treatment, n (%)            | 5 (13)            | 29 (51)                   | <0.001 |
| Coronary angiography, 1/2/3-vessel disease, n | -                 | 20/19/18                  |        |
| <i>Laboratory measurements</i>                |                   |                           |        |
| Total cholesterol (mmol/l)                    | 5.4 (4.6-5.9)     | 3.9 (3.3-4.3)             | <0.001 |
| LDL cholesterol (mmol/l)                      | 3.1 (2.5-3.9)     | 2 (1.7-2.5)               | <0.001 |
| HDL cholesterol (mmol/l)                      | 1.6 (1.4-1.8)     | 1.1 (1.1-1.4)             | <0.001 |
| Triglycerides (mmol/l)                        | 1.1 (0.8-1.7)     | 1.2 (0.9-1.8)             | 0.38   |
| IL-6, pg/ml                                   | 2.5 (1.3-3.1)     | 2.2 (1.6-3.1)             | 0.97   |
| Monocytes ( $\times 10^6$ cells/ml)           | 470 (380-570)     | 480 (370-590)             | 0.66   |
| T cells ( $\times 10^6$ cells/ml)             | 1457 (1202-1624)  | 1350 (975-1777)           | 0.18   |
| Granulocytes ( $\times 10^9$ cells/ml)        | 3190 (2154-4659)  | 3648 (2822-4300)          | 0.28   |
| <i>Psychological measurements</i>             |                   |                           |        |
| CES-D, 4 weeks (n = 57)                       | -                 | 7 (3-14)                  |        |
| CES-D, 12 months (n = 43)                     | -                 | 6 (2-10)                  |        |
| CES-D, 18 months (n = 51)                     | -                 | 7 (3-14)                  |        |
| CES-D <sup>a</sup>                            | 5 (1-8)           | 8 (3-13)                  | 0.020  |
| Cynicism, 4 weeks (n = 54)                    | -                 | 28 (21-33)                |        |
| Cynicism, 12 months (n = 44)                  | -                 | 28 (24-37)                |        |
| Cynicism, 18 months (n = 51)                  | -                 | 27 (21-36)                |        |
| Cynicism <sup>a</sup>                         | 30 (24-34)        | 28 (23-34)                | 0.83   |
| Coping, 4 weeks (n = 53)                      | -                 | 23 (21-26)                |        |
| Coping, 12 months (n = 42)                    | -                 | 24 (21-26)                |        |
| Coping <sup>a</sup>                           | -                 | 24 (21-26)                |        |

CES-D, The Center for Epidemiological Studies - Depression scale.

<sup>a</sup>scores in patients represent mean values derived from 2 or 3 occasions.

Values are given as median (inter-quartile range) or n (%).

doi:10.1371/journal.pone.0105572.t001

markers, such as C-reactive protein and interleukin(IL)-6, thus giving rise to the “inflammatory hypothesis of depression” [9,10].

In the present study, we measured the levels of MMP-9 and its main inhibitors TIMP-1 and -2 in blood mononuclear cells and plasma from post-MI patients and healthy controls. Given that MMP-9 may be implicated in the pathogenesis of both depressive and cardiovascular disorders, we also investigated whether there was a relationship between MMP-9/TIMP levels and depressive symptomatology.

## Methods

### Study population

Patients with a recent MI, defined as non-ST-elevation myocardial infarction, according to universally accepted definitions [11], were consecutively recruited from the Outpatients' Cardiology Clinic at the University Hospital in Linköping, Sweden, 4 weeks after the index event. Exclusion criteria were age > 75 years, severe heart failure, neoplastic disease, major

clinical depression, chronic immunologic disorders or treatment with immunosuppressive/anti-inflammatory agents. In parallel with recruitment of patients, control subjects from the region were randomly invited from the Swedish Population Register. Subjects who accepted the invitation were included as controls if they were anamnesticly healthy. Use of statins or antihypertensive drugs for primary prevention was allowed.

The Center for Epidemiological Studies - Depression scale (CES-D) was used to assess depressive symptomatology [12]. It was designed to measure depressive symptoms in a normal population and is constituted by 20 items with 4 answer categories giving a range of scores from 0 to 60. The Cook-Medley Hostility Scale was used to assess cynical hostility [13]. It is constituted by 12 items with 5 answer categories giving a range of scores from 12 to 60. In patients, CES-D and cynicism were measured on 3 separate occasions; 4 weeks, 12 months and 18 months post-MI. At 4 weeks and 12 months, patients also filled in a questionnaire of mastery (coping) constructed by Pearlin and Schooler [14]. This instru-

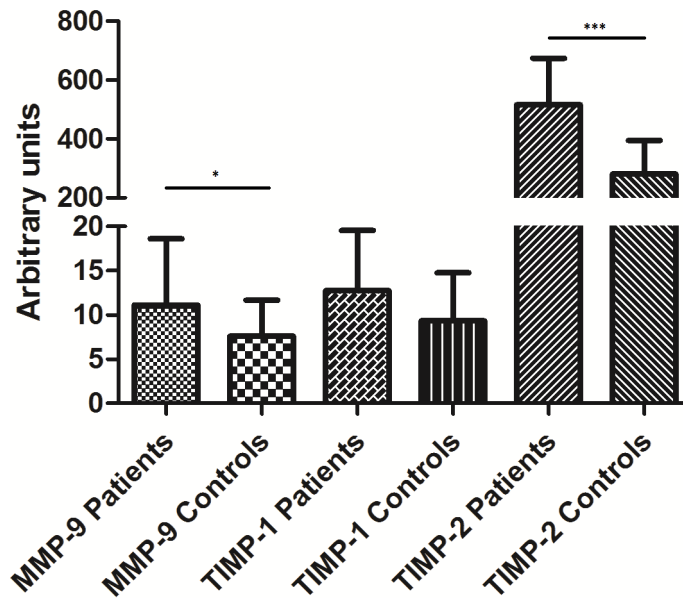

**Figure 1. mRNA expression of MMP-9, TIMP-1 and TIMP-2 in freshly isolated PBMCs. Values are given as median (inter-quartile range).**  
doi:10.1371/journal.pone.0105572.g001

ment is constituted by 7 items with 4 answer categories giving a range in the sum score from 7 to 28. In controls, measurements of CES-D and cynicism were performed at the Outpatients' Cardiology Clinic on one occasion.

In patients, blood sampling was performed between 6 and 18 months after the index event when they were in a metabolically stable condition. The study was conducted in accordance with the ethical guidelines of Declaration of Helsinki, and the research protocols were approved by the Ethical Review Board of Linköping University. Written informed consent was obtained from all patients and controls.

**Cell culture**

Peripheral blood mononuclear cells (PBMCs) were isolated by density centrifugation (Ficoll-Paque) 400 g×g for 40 min at room temperature (RT). PBMCs were then washed twice in phosphate-buffered saline (PBS) with 0.5% fetal calf serum (FCS) and resuspended in RPMI 1640 medium supplemented with L-glutamine (Gibco by Invitrogen, Carlsbad, CA, USA), 10% FCS, 100 U/ml penicillin and 100 µg/ml streptomycin (Gibco by Invitrogen) to a concentration of 10<sup>6</sup> cells/ml. The cells were incubated with or without *E. coli* lipopolysaccharide (LPS) (Sigma-Aldrich, St Louis, MO, USA), 100 ng/ml, for 19 h at 37°C in a humidified atmosphere with 5% of CO<sub>2</sub>. Cell supernatants and

**Table 2. mRNA expression and protein secretion of MMP-9, TIMP-1 and -2 in PBMCs cultured for 19 h with or without LPS.**

| Analyte | PBMCs   | Controls (n = 31)         | Post MI-patients (n = 55) | P                |        |
|---------|---------|---------------------------|---------------------------|------------------|--------|
| MMP-9   | mRNA    | 19-h culture, medium only | 249 (90-350)              | 298 (149-516)    | 0.17   |
|         |         | 19-h culture, LPS         | 147 (100-209)*            | 143 (96-248)***  | 0.98   |
|         | Protein | 19-h culture, medium only | 8 (4.6-11)                | 8.3 (5.3-14)     | 0.77   |
|         |         | 19-h culture, LPS         | 4.8 (3-8.4)*              | 4.6 (3-6.5)***   | 0.38   |
| TIMP-1  | mRNA    | 19-h culture, medium only | 8.7 (6.3-12)              | 14 (10-22)       | <0.001 |
|         |         | 19-h culture, LPS         | 14 (7.8-22)*              | 17 (10-24)       | 0.46   |
|         | Protein | 19-h culture, medium only | 14 (5.9-22)               | 12 (8.7-18)      | 0.96   |
|         |         | 19-h culture, LPS         | 22 (15-33)***             | 23 (17-33)***    | 0.83   |
| TIMP-2  | mRNA    | 19-h culture, medium only | 429 (347-634)             | 491 (344-760)    | 0.35   |
|         |         | 19-h culture, LPS         | 290 (175-392)***          | 197 (134-324)*** | 0.069  |
|         | Protein | 19-h culture, medium only | 2.8 (1.5-3.3)             | 2.2 (1.7-2.6)    | 0.29   |
|         |         | 19-h culture, LPS         | 2.5 (1.7-3.2)             | 2.3 (1.7-3.2)    | 0.48   |

Values, expressed as arbitrary units for mRNA expression and ng/ml for protein secretion, are given as median (inter-quartile range).  
MMP-9, matrix metalloproteinase-9; TIMP-1 and -2, tissue inhibitor of matrix metalloproteinase-1 and -2.  
\* = P<0.05, vs 19-h culture, medium only.  
\*\*\* = P<0.001, vs 19-h culture, medium only.  
doi:10.1371/journal.pone.0105572.t002

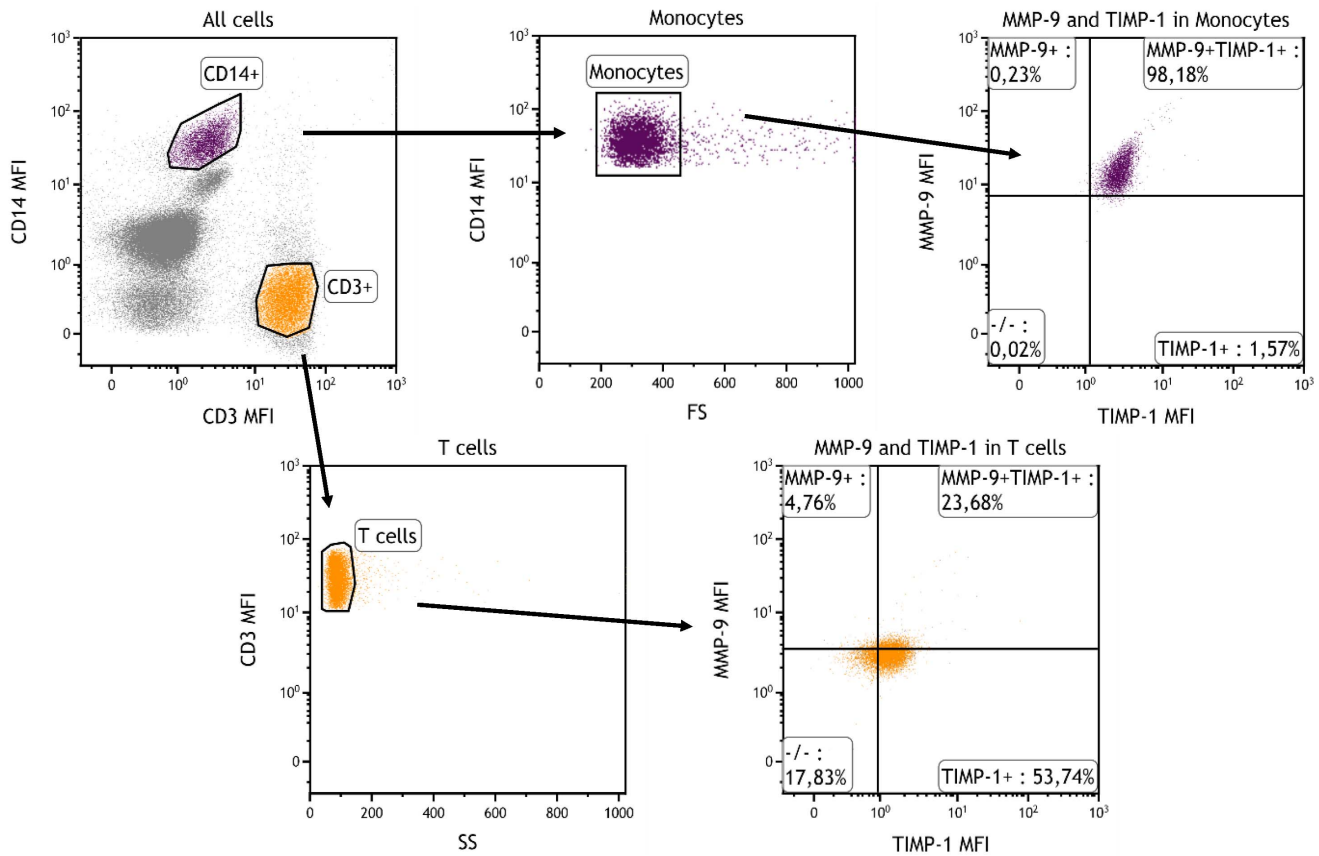

**Figure 2. Gating strategy and representative flow cytometry plot of MMP-9-positive and TIMP-1-positive monocytes and T cells.**  
doi:10.1371/journal.pone.0105572.g002

cells (snap frozen in liquid nitrogen) were collected and stored at  $-80^{\circ}\text{C}$ .

#### Quantitative Real Time rt-PCR

Total RNA was isolated with MagMAX-96 Total RNA Isolation Kit (Life Technologies, Carlsbad, California, USA) from both freshly isolated PBMCs and cultured PBMCs, according to manufacturer's instructions. RNA (66 ng) was reverse transcribed by using high capacity cDNA reverse transcription kit with an RNase inhibitor (Life Technologies) according to manufacturer's instructions. cDNA (1  $\mu\text{L}$ ) was amplified by RT-PCR reactions with  $1 \times$  TaqMan Fast Universal PCR Mastermix (Life Technologies) in 96-well plates on an ABI 7500 Sequence Detector with SDS 1.3.1 software. The following TaqMan Gene Expression Assay kits (Life Technologies) were used: MMP-9, Hs00957562\_m1; TIMP-1, Hs00171558\_m1; TIMP-2, Hs00234278\_m1. Eukaryotic 18S rRNA (Part number: 4352930E) with an amplicon length of 187 bp served as endogenous control. The amount of expressed gene was calculated relative to the amount of rRNA in each sample. Standards were used to create a standard curve in each run according to the standard curve method in user bulletin no 2 (Life Technologies). Each sample was run in duplicates and a maximum deviation of 15% was allowed.

#### Luminex and ELISA

MMP-9 and tissue inhibitors of metalloproteinase (TIMP)-1 and -2 were analyzed in PBMC supernatants and plasma samples by Luminex Performance Assay Human MMP-9 and Human TIMP

Luminex Performance Assay respectively (R&D Systems, Minneapolis MN, USA) according to the protocol provided by the manufacturer. IL-6 in plasma was determined using Quantikine High sensitivity ELISA kit (R&D Systems) according to manufacturer's instructions and the plates were read in a luminometer (Biotek, Germany). The interassay CV were 13% for MMP-9, 6.5% for TIMP1, 14% for TIMP-2 and 7% for IL-6.

#### Intracellular assessment of MMP-9 and TIMP-1 by blood flow cytometry

Cells were stained with the following monoclonal antibodies; CD3- APC/H7 clone SK7 (BD Biosciences, San José, CA, US) and CD14-PeCy7 clone M5E2 (Nordic Biosite, Täby, Sweden). Whole blood and antibodies were incubated for 15 minutes at RT, thereafter erythrocytes were lysed with FACS Lysing Solution (BD Biosciences) for 15 minutes at room temperature (RT). The cells were permeabilized for 30 min at RT with Permeabilizing Solution 2 (BD Biosciences) and washed with Permeabilization buffer (Ebioscience, San Diego, CA, USA). Unspecific binding was blocked with 10% FCS and thereafter, cells were stained with antibodies against MMP-9 and TIMP-1, conjugated with FITC and PE respectively, (RnD Systems) for 30 min in  $4^{\circ}\text{C}$ . After washing in Permeabilization buffer followed by resuspension in PBS with 0.5% FCS, cells were analyzed using Beckman Coulter Gallios (Beckman Coulter, Miami Lakes, Florida, US). The obtained data was analyzed and visualized using the Kaluza 1.2 software (Beckman Coulter). When this analysis was performed, antibodies against TIMP-2 were not commercially available.

**Table 3.** Correlation analysis of MMP-9, TIMP-1 and -2 in plasma, mRNA expression in freshly isolated PBMCs and protein secretion from PBMCs incubated for 19 h in medium only.

|                    | Plasma |               |       | mRNA          |               |          | Supernatant   |               |       |
|--------------------|--------|---------------|-------|---------------|---------------|----------|---------------|---------------|-------|
|                    | MMP9   | TIMP1         | TIMP2 | MMP9 F.       | TIMP1 F.      | TIMP2 F. | MMP9          | TIMP1         | TIMP2 |
| MMP-9 Plasma       |        |               |       |               |               |          |               |               |       |
| TIMP-1 Plasma      | .23    |               |       |               |               |          |               |               |       |
| TIMP-2 Plasma      | .10    | <b>.69***</b> |       |               |               |          |               |               |       |
| MMP-9 mRNA F.      | .51    | -.06          | -.04  |               |               |          |               |               |       |
| TIMP-1 mRNA F.     | .10    | .11           | -.01  | <b>.44***</b> |               |          |               |               |       |
| TIMP-2 mRNA F.     | .10    | .10           | .05   | <b>.46***</b> | <b>.81***</b> |          |               |               |       |
| MMP-9 Supernatant  | .04    | -.18          | -.20  | -.05          | -.08          | -.12     |               |               |       |
| TIMP-1 Supernatant | .01    | -.12          | -.26  | -.09          | .04           | .04      | <b>.51***</b> |               |       |
| TIMP-2 Supernatant | -.09   | -.11          | -.21  | -.09          | -.01          | .05      | <b>.35***</b> | <b>.83***</b> |       |

Spearman's correlation coefficients are presented.

MMP-9, matrix metalloproteinase-9; TIMP-1 and -2, tissue inhibitor of matrix metalloproteinase-1 and -2.

\*\*\*  $p < 0.001$ , F = Freshly isolated PBMC.

doi:10.1371/journal.pone.0105572.t003

## Statistics

SPSS 21 was used for statistical analyses. For clinical and laboratory characteristics, data are presented as median (interquartile range). The statistical significance of any difference between two groups was tested by using Mann-Whitney U-test. Chi-square test was used for nominal data. Friedman's test was used to compare more than 2 observations repeated on the same subjects and Wilcoxon signed-ranks test was used for pair-wise comparisons. A  $p$ -value  $< 0.05$  was considered statistically significant while a  $p$ -value between 0.05 and 0.1 was considered a trend. When Spearman's rank correlation coefficient was used for correlation analyses,  $p$ -value  $< 0.01$  was considered significant.

## Results

### Study population

Clinical and biological characteristics of patients and controls are presented in Table 1. There were no differences in age, sex distribution, body mass index, smoking status, plasma IL-6 or leukocyte cell subsets between the groups while parameters such as statin use and lipid profile differed significantly. Table 1 also shows the results of psychological measurements in addition to the number of patients completing each questionnaire on different test occasions. CES-D scores did not vary significantly between different test occasions, neither did cynical hostility or mastery scores. Therefore, arithmetic means of samples from 2 or 3 occasions were used in all statistical analyses. Post-MI patients had significantly higher CES-D scores compared with controls, while cynical hostility did not differ between groups.

### Expression of MMP-9 and endogenous inhibitors in PBMCs

The mRNA levels of MMP-9 and its main endogenous inhibitors TIMP-1 and -2 were analyzed in freshly isolated PBMCs and in PBMCs cultured with or without LPS. In freshly isolated PBMCs, the mRNA expression of MMP-9 was significantly higher in patients than in controls (Figure 1). After 19 h of culture in medium, MMP-9 mRNA levels were markedly increased in both patients and controls although this increase was blunted when LPS was added (Table 2). Compared with controls, patients showed significantly higher levels of TIMP-2 mRNA in freshly isolated PBMCs while TIMP-1 mRNA levels were significantly higher in patients' cells after 19 h of culture. Upon LPS stimulation, TIMP-1 mRNA levels in PBMCs increased while TIMP-2 mRNA levels decreased without any differences between patients and controls. The ratios MMP-9/TIMP-1 and MMP-9/TIMP-2 in freshly isolated PBMCs did not differ between patients and controls.

### Secretion of MMP-9 and endogenous inhibitors by PBMCs

The secretion of MMP-9 and TIMP-1 and -2 was analyzed in supernatants of PBMCs cultured with or without LPS (Table 2). The secretion of MMP-9 was significantly reduced by LPS. On the other hand, the secretion of TIMP-1 was significantly enhanced by LPS while TIMP-2 levels remained unaffected. Neither the secretion of MMP-9, nor the secretion of TIMP-1 or -2, differed between post-MI patients and controls.

### Plasma levels of MMP-9 and endogenous inhibitors

MMP-9 and TIMP-1 and -2 were also analyzed in plasma samples. The level of MMP-9 did not differ in post-MI patients compared with controls, 50 (38–67) vs 49 (41–81) ng/ml,  $p = .512$ ,

**Table 4.** Characteristics of post-MI patients with sustained low CES-D scores ( $\leq 6$  on at least 2 occasions) or high CES-D scores ( $\geq 7$  on at least 2 occasions).

|                                                      | Sustained low CES-D scores (n=24) | Sustained high CES-D scores (n=27) | P      |
|------------------------------------------------------|-----------------------------------|------------------------------------|--------|
| <i>Psychological measurements</i>                    |                                   |                                    |        |
| <b>CES-D<sup>a</sup></b>                             | 3.2 (1.6-4.3)                     | 13 (10-19)                         | <0.001 |
| <b>Cynical hostility*</b>                            | 25 (21-31)                        | 32 (26-36)                         | 0.004  |
| <b>Coping*</b>                                       | 25 (23-26)                        | 20 (18-26)                         | <0.001 |
| <i>Clinical measurements</i>                         |                                   |                                    |        |
| <b>Age, years</b>                                    | 67 (64-71)                        | 65 (56-69)                         | 0.22   |
| <b>Sex (male/female)</b>                             | 18/6                              | 21/5                               | 0.72   |
| <b>Body mass index, kg/m<sup>2</sup></b>             | 27 (24-30)                        | 28 (25-31)                         | 0.33   |
| <b>Smoking, n (%)</b>                                | 2 (8)                             | 3 (12)                             | 0.67   |
| <b>Diabetes, n (%)</b>                               | 4 (17)                            | 5 (19)                             | 0.73   |
| <b>Anti-hypertensive treatment, n (%)</b>            | 11 (46)                           | 12 (46)                            | >0.99  |
| <b>Coronary angiography, 1/2/3-vessel disease, n</b> | 10/7/7                            | 8/10/9                             | 0.37   |
| <i>Laboratory measurements</i>                       |                                   |                                    |        |
| <b>MMP-9, plasma ng/ml</b>                           | 41 (30-75)                        | 52 (44-67)                         | 0.20   |
| <b>TIMP-1, plasma ng/ml</b>                          | 93 (78-100)                       | 84 (70-95)                         | 0.29   |
| <b>TIMP-2, plasma ng/ml</b>                          | 86 (77-91)                        | 84 (67-91)                         | 0.27   |
| <b>MMP-9, mRNA<sup>†</sup></b>                       | 290 (150-520)                     | 220 (120-610)                      | 0.98   |
| <b>TIMP-1, mRNA<sup>†</sup></b>                      | 16 (12-25)                        | 12 (8-18)                          | 0.11   |
| <b>TIMP-2, mRNA<sup>†</sup></b>                      | 530 (330-880)                     | 450 (390-560)                      | 0.36   |
| <b>IL-6, plasma pg/ml</b>                            | 1.9 (1.4-3.3)                     | 2.1 (1.6-2.8)                      | 0.82   |

CES-D, The Center for Epidemiological Studies - Depression scale; MMP-9, matrix metalloproteinase-9; TIMP-1 and -2, tissue inhibitor of matrix metalloproteinase-1 and -2.

\* = scores in patients represent mean values derived from 2 or 3 occasions.

<sup>†</sup> = mRNA values in freshly isolated PBMCs, expressed as arbitrary units.

Values are given as median (inter-quartile range) or n (%).

doi:10.1371/journal.pone.0105572.t004

neither did the levels of TIMP-1 and -2, 89 (72–97) vs 92 (80–106)ng/ml, and 84 (71–92) vs 86 (78–92)ng/ml, respectively. The ratios MMP-9/TIMP-1 and MMP-9/TIMP-2 in plasma did not differ between patients and controls.

#### Intracellular staining of MMP-9 and TIMP-1

The presence of MMP-9 and TIMP-1 was assessed in circulating monocytes and T cells by whole blood flow cytometry, see Figure 2. The vast majority of monocytes were MMP-9-positive, 98 (86–100) %, while 19 (3.8–50) % of the T cells showed positive staining for MMP-9. More than 99 % of the monocytes and 84 (79–88) % of the T cells were TIMP-1-positive. In order to perform a semi-quantitative assessment of MMP-9 and TIMP-1 protein, median fluorescence intensities (MFI) of MMP-9 and TIMP-1 were determined related to their own isotype controls. The MFI values of MMP-9 were significantly higher in monocytes than in T cells, 2.8 (2.2–4.6) vs 1.4 (1.1–1.6),  $p < 0.001$ , as were MFI values of TIMP-1, 4.7 (4.4–5.5) vs 3.1 (2.9–3.4),  $p < 0.001$ . There were no differences in MFI between controls and CAD patients.

#### Bivariate correlations

In a bivariate correlation analyses including all subjects, the mRNA levels of MMP-9, TIMP-1 and -2 were strongly intercorrelated as were the levels of MMP-9, TIMP-1 and -2 in cell supernatants. In plasma, TIMP-1 and -2, but not MMP-9,

were intercorrelated. Circulating levels of MMP-9 and TIMPs did not show any correlations, neither with mRNA levels in PBMCs, nor with amounts released from PBMCs (Table 3). In the whole study population, depressive symptoms also correlated positively with cynical hostility ( $r = 0.267$ ,  $p < 0.01$ ). In the patient population, depressive symptoms correlated negatively with mastery ( $r = -0.594$ ,  $p < 0.001$ ). There were no significant associations between depressive symptoms and measurements of MMP-9, TIMP-1 or -2 at any level (mRNA in PBMCs, protein release from PBMCs or plasma concentrations), neither were there any significant correlations between cynicism or mastery and measurements of MMP-9 or TIMPs. MMP-9 or TIMPs did not correlate with IL-6 in plasma, neither did psychological factors correlate with IL-6 levels.

#### Comparison between patients with sustained low or high levels of depressive symptoms

Patients were divided into two groups depending on sustained low or high CES-D scores; those with CES-D  $\leq 6$  on at least two occasions ( $n = 24$ ) and those with CES-D  $\geq 7$  on at least two occasions ( $n = 27$ ) based on median levels derived from the different test occasions. Patients with sustained elevated depressive symptoms had significantly higher scores of cynical hostility and lower scores of mastery than patients with sustained low CES-D scores. As shown in Table 4, there were no significant differences in clinical characteristics between the 2 groups. Plasma levels of

MMP-9 and TIMPs or mRNA levels of MMP-9 and TIMPs in freshly isolated PBMCs did not differ, neither did mRNA levels in cultured PBMCs or release of MMP-9 and TIMPs *ex vivo* differ between the groups (data not shown).

## Discussion

The overexpression of MMP-9 mRNA in freshly isolated PBMCs from post-MI patients highlights the presence of ongoing low-grade inflammation in clinically stable conditions of CAD. It supports previous results showing enhanced MMP-9 mRNA expression in PBMCs or isolated monocytes from patients with CAD or carotid atherosclerosis [15–17]. This characteristic seems to be shared by other chronic inflammatory disorders since increased expression of MMP-9 mRNA in blood mononuclear cells has been demonstrated in multiple sclerosis [18] and systemic lupus erythematosus [19]. Likewise, our findings that post-MI patients exhibited increased TIMP-1 and -2 mRNA levels in PBMCs are in line with previous studies of patients with multiple sclerosis [18,20]. TIMP-1 and -2 belong to the family of endogenous inhibitors that regulates MMP-9 activity. Although TIMP-1 is often mentioned as the main inhibitor, TIMP-2 has been shown to be more effective than TIMP-1 in inhibiting MMP-9 [21,22]. Upregulation of TIMP-1 has been described to occur concomitantly with expression of MMP-9 [23] and not unexpectedly, we found significant correlations between MMP-9 and TIMP-1 in PBMCs. We also found correlations between MMP-9 and TIMP-2 and between TIMP-1 and TIMP-2 at all levels (mRNA, protein release and plasma). An increased ratio of MMP-9/TIMP-1 has been proposed to reflect increased MMP-9 activity [24] and in a previous study, Brunner et al. [15] showed that a decreased expression of TIMP-1 in relation to MMP-9 correlated with clinical stages of CAD [15]. Our data thus suggest that TIMPs, in particular TIMP-2, are appropriately upregulated *in vivo* to counteract MMP-9 in stabilized post-MI patients. It is, however, known that MMP-9 is rapidly upregulated in monocytes during differentiation into macrophages [23,25]. Therefore, we also assessed mRNA expression and protein release of MMP-9 and its inhibitors in cultured cells but found no evidence for MMP-9 dominance in post-MI patients compared with controls. Data rather indicated the opposite since patients' cells expressed significantly higher mRNA levels of TIMP-1, but not MMP-9 or TIMP-2, *in vitro*.

The elevated mRNA levels of MMP-9 and TIMPs in PBMCs were not reflected by protein levels in plasma. These findings are in agreement with our previous results [16] and also with a previous study by Lichthagen et al. [26] who compared mRNA levels of MMP-9, TIMP-1 and -2 in PBMCs with circulating protein concentrations without finding any correlations between mRNA and plasma levels.

Among blood mononuclear cells, monocytes are known to be the main producers of MMP-9 [20]. However, the expression of MMP-9 in T cells can be upregulated in immune-mediated diseases [27]. Since monocytes and T cells constitute the major infiltrating cell types in atherosclerosis, we compared the expression of MMP-9 (and TIMP-1) in monocytes and T cells by using flow cytometry. Results confirmed that monocytes was the predominant source of both MMP-9 and TIMP-1 and did not provide any evidence that these proteins were upregulated in T cells from CAD patients.

The levels of depressive symptoms were shown to be persistently elevated in post-MI patients. A few previous studies have performed longitudinal assessments of depressive symptoms up to 12 months after MI and in line with our findings, they have

shown that symptoms remain elevated [28–30]. Furthermore, the depressive symptoms were correlated with cynical hostility. Cynical hostility is a strong and robust predictor of depressive mood [31] and has been linked to an increased risk of CAD [32,33]. As expected, the depressive symptoms were also inversely correlated with mastery [5,34]. Recently, the protective effect of psychological resources, such as mastery, on cardiovascular morbidity was emphasized [34].

The MMP-9 levels in plasma were not related to depressive symptoms, neither were they related to cynical hostility or mastery. This is in contrast with findings from a population-based sample of 402 individuals reporting that MMP-9 in plasma was associated with depressive symptoms (CES-D) and even more strongly with cynical hostility [5]. A proteomic investigation in a large population of psychiatric patients showed that, after insulin levels, MMP-9 levels in plasma showed the strongest association with major depression [6] and a recent study confirmed that patients with depression had persistently higher serum levels of MMP-9 compared with patients with mania or healthy controls [35]. However, plasma or serum concentrations of MMP-9 may not reflect what is going on at a cellular level [16,26]. Previous studies by Suarez et al. [36,37] reported that enhanced expression of cytokines and chemokines by blood mononuclear cells, suggesting a “primed” or pre-activated state of the cells, was associated with depressive symptoms in apparently healthy individuals. Interestingly, Lutgendorf et al. [7] later found that depressive symptoms (CES-D) in a population of 56 patients with ovarian cancer were related to higher MMP-9 levels in tumor-associated macrophages. In the present study, we performed extensive measurements of MMP-9 and its inhibitors in blood mononuclear cells without finding any correlations with depressive symptoms. It may be argued that depressive symptoms in our population were not severe enough. Among post-MI patients, 18% had CES-D scores  $\geq 16$ , a cut-off that has been associated with clinical depression [12]. This is consistent with several previous studies reporting that 15 to 20 % of post-MI patients meet the criteria for clinical depression [8]. However, not only clinical depression, but also elevated depressive symptoms may be associated with inflammation and a dose-response relationship between depressive symptoms and MMP-9 (or other inflammatory markers) has been proposed [9,38].

One major limitation of our study is the small sample size not allowing us to evaluate the impact of clinical depression or other potential confounders like diabetes, obesity and health behaviors. Since we included only patients who were stabilized after a non-STEMI, the results may not apply to patients with a history of STEMI, neither to patients with a poor short-term prognosis after MI. On the other hand, the repeated assessments of CES-D is a strength since depressive symptoms may change over time. Also, the extensive analysis of MMP-9 and TIMPs at several levels can be regarded as a strength.

Lately, the theory that inflammation is a link between depressive symptoms and CAD has been questioned. In a retrospective case-control study, the association between depressive mood and CAD remained stable after adjustment for CRP and IL-6 levels [39]. Similarly, large prospective population studies show that associations between depressive symptoms (CES-D) or negative affect and future CAD events remain unchanged after adjustment for inflammatory markers [40,41]. Importantly, other studies demonstrate that the association between depressive symptoms and inflammatory markers no longer remain significant after adjustment for behavioral factors, like physical inactivity, smoking and high body mass index [42,43].

To summarize, post-MI patients exhibited overexpression of MMP-9 and TIMP mRNA in their blood mononuclear cells and also, sustained elevated depressive symptoms. Both are factors with potential impact on cardiovascular prognosis but based on our findings, they may represent two unrelated phenomena after MI.

## References

- Chen F, Eriksson P, Hansson GK, Herzfeld I, Klein M, et al (2005) Expression of matrix metalloproteinase 9 and its regulators in the unstable coronary atherosclerotic plaque. *Int J Mol Med* 15: 57–65.
- Gough PJ, Gomez IG, Wille PT, Raines EW (2006) Macrophage expression of active MMP-9 induces acute plaque disruption in apoE-deficient mice. *J Clin Invest* 116: 59–69.
- Blankenberg S, Rupprecht HJ, Poirier O, Bickel C, Smieja M, et al (2003) Plasma concentrations and genetic variation of matrix metalloproteinase 9 and prognosis of patients with cardiovascular disease. *Circulation* 107: 1579–1585.
- Zouridakis E, Avanzas P, Arroyo-Espiguero R, Fredericks S, Kaski JC (2004) Markers of inflammation and rapid coronary artery disease progression in patients with stable angina pectoris. *Circulation* 110: 1747–1753.
- Garvin P, Nilsson L, Carstensen J, Jonasson L, Kristenson M (2009) Plasma levels of matrix metalloproteinase-9 are independently associated with psychosocial factors in a middle-aged normal population. *Psychosom Med* 71: 292–300.
- Domenici E, Wille DR, Tozzi F, Prokopenko I, Miller S, et al (2010) Plasma protein biomarkers for depression and schizophrenia by multi analyte profiling of case-control collections. *PLoS One* 5: e9166.
- Lutgendorf SK, Lamkin DM, Jennings NB, Arevalo JM, Penedo F, et al (2008) Biobehavioral influences on matrix metalloproteinase expression in ovarian carcinoma. *Clin Cancer Res* 14: 6839–6846.
- Lichtman JH, Bigger JT, Blumenthal JA, Frasure-Smith N, Kaufmann PG, et al (2008) Depression and coronary heart disease: Recommendations for screening, referral, and treatment: A science advisory from the american heart association prevention committee of the council on cardiovascular nursing, council on clinical cardiology, council on epidemiology and prevention, and interdisciplinary council on quality of care and outcomes research: Endorsed by the american psychiatric association. *Circulation* 118: 1768–1775.
- Howren MB, Lamkin DM, Suls J (2009) Associations of depression with C-reactive protein, IL-1, and IL-6: A meta-analysis. *Psychosomatic Medicine* 71: 171–186.
- Miller AH, Maletic V, Raison CL (2009) Inflammation and its discontents: The role of cytokines in the pathophysiology of major depression. *Biol Psychiatry* 65: 732–741.
- Thygesen K, Alpert JS, White HD, Jaffe AS, Apple FS, et al (2007) Universal definition of myocardial infarction: Kristian thygesen, joseph S. alpert and harvey D. white on behalf of the joint ESC/ACCF/AHA/WHF task force for the redefinition of myocardial infarction. *European Heart Journal* 28: 2525–2538.
- Radloff LS (1977) The CES-D scale: A self-report depression scale for research in the general population. *Applied Psychological Measurement* 1: 385–401.
- Cook WW, Medley DM (1954) Proposed hostility and pharisaic-virtue scales for the MMP. *J Appl Psychol* 38: 414–418.
- Pearlin LI, Schooler C (1978) The structure of coping. *J Health Soc Behav* 19: 2–21.
- Brunner S, Kim J, Methe H (2010) Relation of matrix metalloproteinase-9/tissue inhibitor of metalloproteinase-1 ratio in peripheral circulating CD14+ monocytes to progression of coronary artery disease. *Am J Cardiol* 105: 429–434.
- Jonsson S, Lundberg A, Kalvegren H, Bergstrom I, Szymanowski A, et al (2011) Increased levels of leukocyte-derived MMP-9 in patients with stable angina pectoris. *PLoS One* 6: e19340.
- Sternberg Z, Ghanim H, Gillotti KM, Tario Jr JD, Munschauer F, et al (2013) Flow cytometry and gene expression profiling of immune cells of the carotid plaque and peripheral blood. *Atherosclerosis* 229: 338–347.
- Kouwenhoven M, Ozenci V, Gomes A, Yarin D, Giedraitis V, et al (2001) Multiple sclerosis: Elevated expression of matrix metalloproteinases in blood monocytes. *J Autoimmun* 16: 463–470.
- Matache C, Stefanescu M, Dragomir C, Tanaseanu S, Onu A, et al (2003) Matrix metalloproteinase-9 and its natural inhibitor TIMP-1 expressed or secreted by peripheral blood mononuclear cells from patients with systemic lupus erythematosus. *J Autoimmun* 20: 323–331.
- Bar-Or A, Nuttall RK, Duddy M, Alter A, Kim HJ, et al (2003) Analyses of all matrix metalloproteinase members in leukocytes emphasize monocytes as major inflammatory mediators in multiple sclerosis. *Brain* 126: 2738–2749.
- Brew K, Dinakarandian D, Nagase H (2000) Tissue inhibitors of metalloproteinases: Evolution, structure and function. *Biochimica et Biophysica Acta (BBA) - Protein Structure and Molecular Enzymology* 1477: 267–283.
- Howard EW, Bullen EC, Banda MJ (1991) Preferential inhibition of 72- and 92-kDa gelatinases by tissue inhibitor of metalloproteinases-2. *Journal of Biological Chemistry* 266: 13070–13075.
- Newby AC (2008) Metalloproteinase expression in monocytes and macrophages and its relationship to atherosclerotic plaque instability. *Arterioscler Thromb Vasc Biol* 28: 2108–2114.
- Avolio C, Filippi M, Tortorella C, Rocca MA, Ruggieri M, et al (2005) Serum MMP-9/TIMP-1 and MMP-2/TIMP-2 ratios in multiple sclerosis: Relationships with different magnetic resonance imaging measures of disease activity during IFN-beta-1a treatment. *Mult Scler* 11: 441–446.
- Gong Y, Hart E, Shchurin A, Hoover-Plow J (2008) Inflammatory macrophage migration requires MMP-9 activation by plasminogen in mice. *J Clin Invest* 118: 3012–3024.
- Lichtinghagen R, Huegel O, Seifert T, Haberkorn CI, Michels D, et al (2000) Expression of matrix metalloproteinase-2 and -9 and their inhibitors in peripheral blood cells of patients with chronic hepatitis C. *Clinical Chemistry* 46: 183–192.
- Abraham M, Shapiro S, Karni A, Weiner HL, Miller A (2005) Gelatinases (MMP-2 and MMP-9) are preferentially expressed by Th1 vs. Th2 cells. *J Neuroimmunol* 163: 157–164.
- Lesperance F, Frasure-Smith N, Talajic M (1996) Major depression before and after myocardial infarction: Its nature and consequences. *Psychosom Med* 58: 99–110.
- Mayou RA, Gill D, Thompson DR, Day A, Hicks N, et al (2000) Depression and anxiety as predictors of outcome after myocardial infarction. *Psychosom Med* 62: 212–219.
- Lane D, Carroll D, Ring C, Beevers DG, Lip GY (2002) The prevalence and persistence of depression and anxiety following myocardial infarction. *Br J Health Psychol* 7: 11–21.
- Nabi H, Singh-Manoux A, Ferrie JE, Marmot MG, Melchior M, et al (2010) Hostility and depressive mood: Results from the whitehall II prospective cohort study. *Psychol Med* 40: 405–413.
- Matthews KA, Gump BB, Harris KF, Haney TL, Barefoot JC (2004) Hostile behaviors predict cardiovascular mortality among men enrolled in the multiple risk factor intervention trial. *Circulation* 109: 66–70.
- Tindle HA, Chang YF, Kuller LH, Manson JE, Robinson JG, et al (2009) Optimism, cynical hostility, and incident coronary heart disease and mortality in the women's health initiative. *Circulation* 120: 656–662.
- Lundgren O, Garvin P, Jonasson L, Andersson G, Kristenson M (2014) Psychological resources are associated with reduced incidence of coronary heart disease: an 8-year follow-up of a community-based swedish sample. *Int J Behav Med*.
- Rybakowski JK, Remlinger-Molenda A, Czech-Kucharska A, Wojcicka M, Michalak M, et al (2013) Increased serum matrix metalloproteinase-9 (MMP-9) levels in young patients during bipolar depression. *J Affect Disord* 146: 286–289.
- Suarez EC, Lewis JG, Krishnan RR, Young KH (2004) Enhanced expression of cytokines and chemokines by blood monocytes to in vitro lipopolysaccharide stimulation are associated with hostility and severity of depressive symptoms in healthy women. *Psychoneuroendocrinology* 29: 1119–1128.
- Suarez EC, Krishnan RR, Lewis JG (2003) The relation of severity of depressive symptoms to monocyte-associated proinflammatory cytokines and chemokines in apparently healthy men. *Psychosomatic Medicine* 65: 362–368.
- Garvin P, Nilsson L, Carstensen J, Jonasson L, Kristenson M (2008) Circulating matrix metalloproteinase-9 is associated with cardiovascular risk factors in a middle-aged normal population. *PLoS One* 3: e1774.
- Empana JP, Sykes DH, Luc G, Juhan-Vague I, Arveiler D, et al (2005) Contributions of depressive mood and circulating inflammatory markers to coronary heart disease in healthy european men: The prospective epidemiological study of myocardial infarction (PRIME). *Circulation* 111: 2299–2305.
- Nabi H, Singh-Manoux A, Shipley M, Gimeno D, Marmot MG, et al (2008) Do psychological factors affect inflammation and incident coronary heart disease: The whitehall II study. *Arteriosclerosis, Thrombosis, and Vascular Biology* 28: 1398–1406.
- Davidson KW, Schwartz JE, Kirkland SA, Mostofsky E, Fink D, et al (2009) Relation of inflammation to depression and incident coronary heart disease (from the canadian nova scotia health survey [NSHS95] prospective population study). *Am J Cardiol* 103: 755–761.
- Duivis HE, de Jonge P, Penninx BW, Na BY, Cohen BE, et al (2011) Depressive symptoms, health behaviors, and subsequent inflammation in patients with coronary heart disease: Prospective findings from the heart and soul study. *Am J Psychiatry* 168: 913–920.
- Michal M, Wiltink J, Kirschner Y, Wild PS, Munzel T, et al (2013) Differential associations of depressive symptom dimensions with cardio-vascular disease in the community: Results from the gutenbergh health study. *PLoS One* 8: e72014.

## Author Contributions

Conceived and designed the experiments: SJ AL LJ. Performed the experiments: SJ AL. Analyzed the data: SJ AL LJ. Contributed reagents/materials/analysis tools: SJ AL LJ. Contributed to the writing of the manuscript: SJ AL LJ.
